# Supplementary material for: A trimodal magnetic navigation-enhanced nanoplatform for spatiotemporally controlled chemo-photodynamic synergistic cancer therapy
Source: Royal Society of Chemistry journal article supplement (doi:10.1039/d5bm00579e), 2025-01-01
Supplement: d5bm00579e1.pdf [file d5bm00579e1.pdf]

## *Supporting information*

# **Trimodal Magnetic Navigation-Enhanced Nanoplatfom for Spatiotemporally Controlled Chemo-Photodynamic Synergistic Cancer Therapy**

Cui Ma<sup>‡1</sup>, Yaqi Cui<sup>‡2,4</sup>, Bailong Liu<sup>3</sup>, Min Liu<sup>3\*</sup>, Xia Chen<sup>1\*</sup>, Biao Dong<sup>2\*</sup>

<sup>1</sup>National & Local United Engineering Laboratory for Chinese Herbal Medicine Breeding and Cultivation, School of Life Sciences, Jilin University, Changchun, 130012, China;

<sup>2</sup>State Key Laboratory on Integrated Optoelectronics, College of Electronic Science and Engineering, Jilin University, Changchun, 130012, China;

<sup>3</sup>Department of Radiation Oncology, The Second Affiliated Hospital of Anhui Medical University, 678 Furong Road, Hefei, Anhui 230601, China;

<sup>4</sup>Xinjiang Medical University, School of Medical Engineering and Technology, Urumqi 830011, China.

\*Corresponding authors:

Prof. Min Liu, Email: liumin05162022@126.com;

Prof. Xia Chen, Email: chenxia@jlu.edu.cn;

Prof. Biao Dong, Email: dongb@jlu.edu.cn.

<sup>‡</sup>These authors contributed equally to this study.

## 1. Supplementary figures

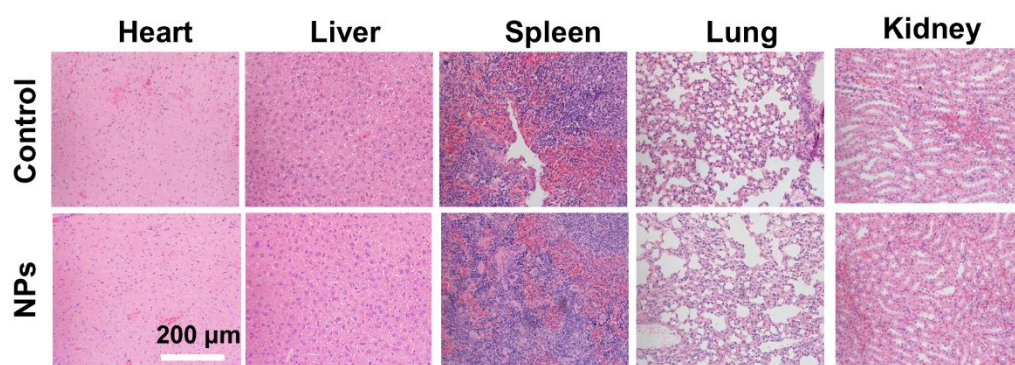

**Figure S1.** H&E staining images of mouse organs with different treatments after 60 days.

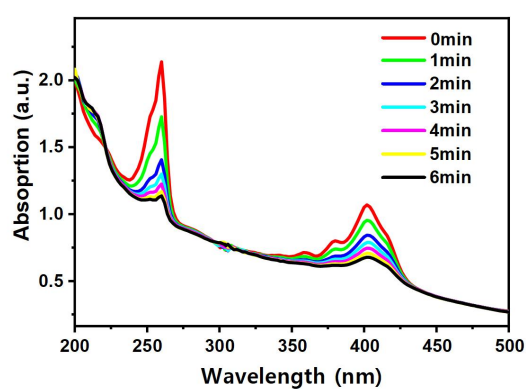

**Figure S2.** UV-vis absorption spectra of singlet oxygen probe (ABDA) in the presence of  $\text{Fe}_3\text{O}_4@\text{Ce6-DOX}$ .

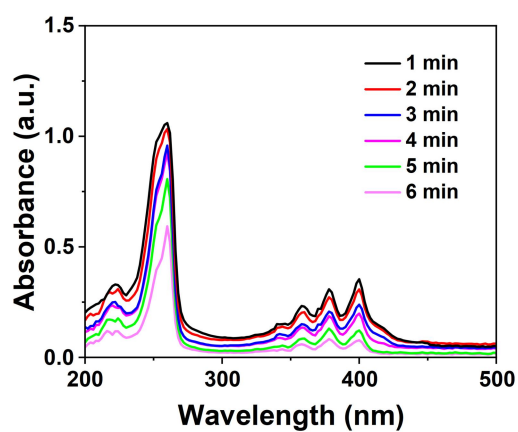

**Figure S3:** UV-vis absorption spectra of singlet oxygen probe (ABDA) in the presence of free Ce6.

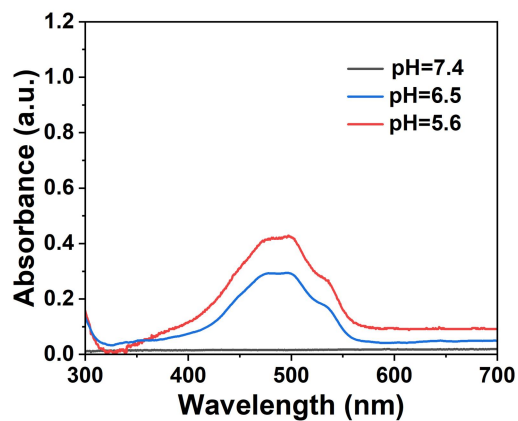

**Figure S4:** Absorption spectra of  $\text{Fe}_3\text{O}_4@\text{Ce6-DOX@liposome}$  under different pH conditions.

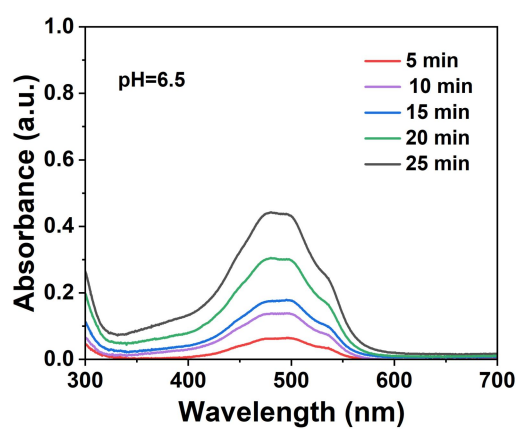

**Figure S5:** Absorption spectra of  $\text{Fe}_3\text{O}_4@\text{Ce6-DOX@liposome}$  release over time at pH 6.5.

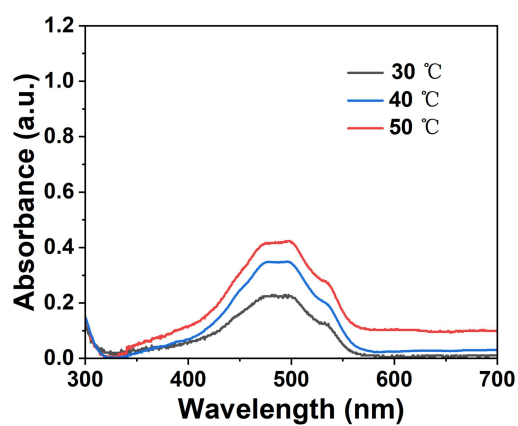

**Figure S6:** Absorption spectra of  $\text{Fe}_3\text{O}_4@\text{Ce6-DOX@liposome}$  release as a function of temperature at pH 5.6.

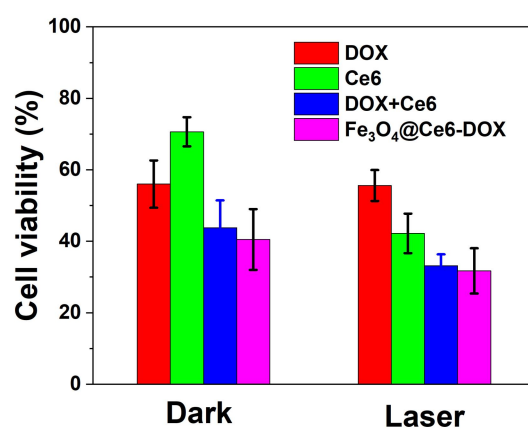

**Figure S7.** Cell viability data after treatment with different drugs.

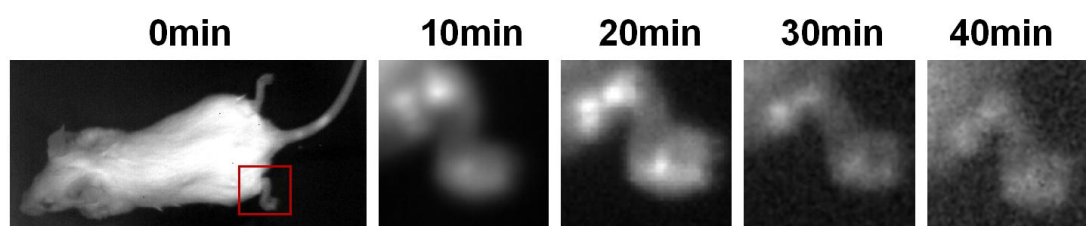

**Figure S8.** Under magnetic field guidance, the time-dependent accumulation of nanomaterials at tumor sites was observed.

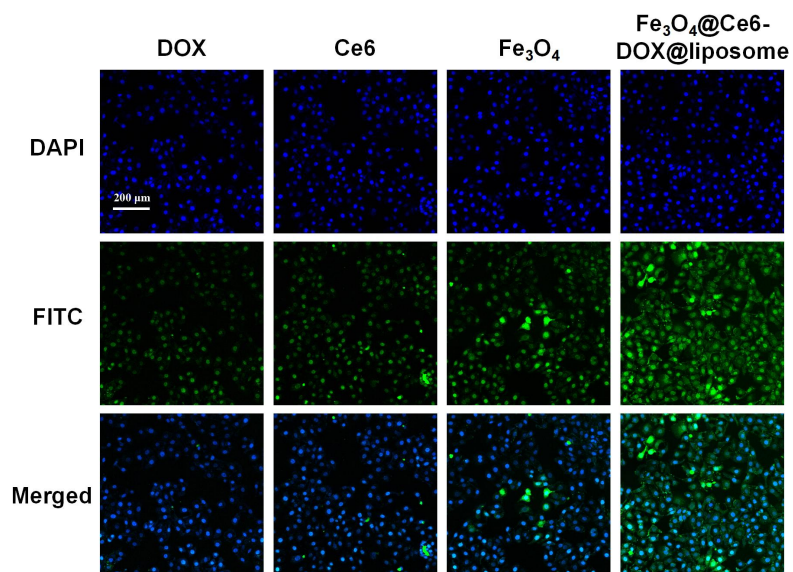

**Figure S9.** Cellular uptake of different nanoformulations in tumor cells.

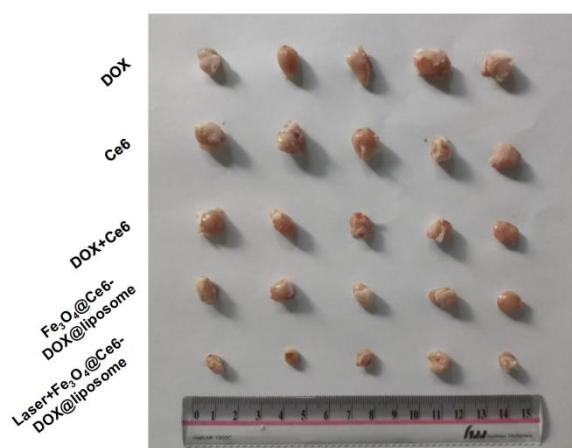

**Figure S10.** Tumor photographs with different treatments.

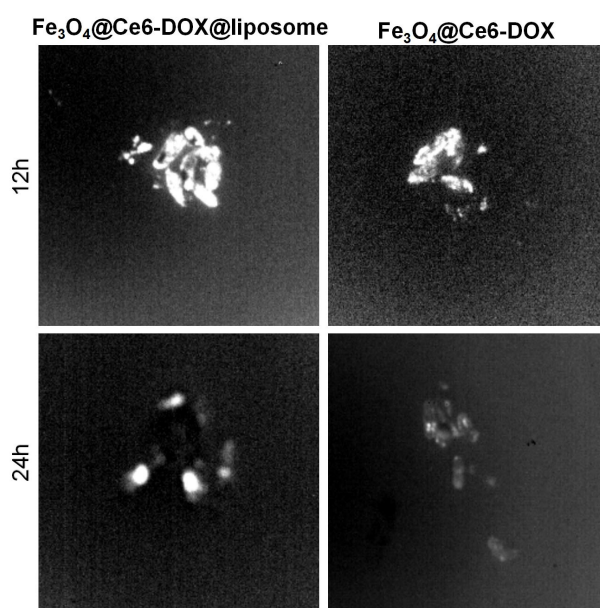

**Figure S11:** Fluorescence imaging of feces from mice treated with  $\text{Fe}_3\text{O}_4@\text{Ce6-DOX@liposome}$  and  $\text{Fe}_3\text{O}_4@\text{Ce6-DOX}$  at 12 h and 24 h post-injection.
